# Supplementary material
Source: Research Square preprint supplement (doi:10.21203/rs.3.rs-10046462/v1)
Supplement: Supplementary file 1 [file edbb4d3e6a0073bbbdfff5e6.pdf]

# Supplementary Material for Evidence Readiness Assessment for Drug Repurposing Using Data Quality, Safety Signals, Network Structure, and Bayesian Uncertainty

Francis Osei<sup>1</sup>

francis@bayezian.com

## 1 Supplementary Methods

### 1.1 Model constants and parameter trace

The evidence-readiness model used a fixed set of constants for the main analysis. These constants governed the concentration of the literature-derived Beta prior, the strength of the graph-derived likelihood contribution, the adverse-evidence penalty, and the safety-overlap adjustment. Table S1 reports the parameter values used in the main analysis. The concentration function was

**Table S1.** Model constants used in the main evidence-readiness analysis.

| Parameter                    | Symbol     | Value | Role in the model                                                                                  |
|------------------------------|------------|-------|----------------------------------------------------------------------------------------------------|
| Maximum concentration        | $c_{\max}$ | 200   | Upper bound for the article-count contribution to the Beta prior concentration.                    |
| Concentration rate           | $\tau$     | 25    | Rate parameter controlling the increase in prior concentration as usable article count increases.  |
| Likelihood strength          | $\lambda$  | 50    | Fixed pseudo-count strength assigned to the graph-derived likelihood contribution.                 |
| Adverse-evidence weight      | $w_A$      | 2     | Weight applied to adverse literature in the penalised semantic evidence score.                     |
| Safety dampening coefficient | $\kappa$   | 0.5   | Coefficient applied to the safety-overlap term $\gamma$ in the final semantic evidence adjustment. |

$$c(M) = c_{\max} \left( 1 - \exp \left( -\frac{M}{\tau} \right) \right),$$

where  $M$  denotes the number of usable classified articles. The main analysis used  $c_{\max} = 200$  and  $\tau = 25$ . Graph evidence was represented as a Beta likelihood contribution with strength  $\lambda = 50$ .

The adverse-evidence coefficient  $w_A = 2$  was chosen to place greater penalty on adverse semantic evidence than on a matched count of therapeutic evidence. This conservative choice reduces false-positive readiness signals when the retrieved

literature contains harm, worsening, or clinically relevant adverse association signals. The safety coefficient  $\kappa = 0.5$  was chosen as a bounded dampening term. It reduces readiness in the presence of safety overlap while avoiding a binary exclusion rule, since safety overlap does not establish causation.

## 1.2 Sensitivity analysis design

A one-at-a-time perturbation analysis was conducted for the five main constants. Each parameter was varied at  $0.5\times$  and  $1.5\times$  its baseline value, with all other parameters held at baseline. Trial records, terminology mappings, PubMed/PMC article classifications, safety-overlap scores, and graph features were fixed during perturbation.

A scenario was classified as stable if it met all three criteria shown in Table S2.

**Table S2.** Pre-specified stability criteria for parameter perturbation scenarios.

| Diagnostic                           | Threshold   | Interpretation                                               |
|--------------------------------------|-------------|--------------------------------------------------------------|
| Spearman rank correlation            | $\geq 0.95$ | Rank order remains close to the baseline ordering.           |
| Median absolute posterior-mean shift | $\leq 0.05$ | Posterior means show limited central displacement.           |
| Unchanged quality flags              | $\geq 90\%$ | Rule-based evidence categories remain stable for most pairs. |

## 2 Supplementary Results

### 2.1 Evidence coverage

Coverage tiers were used to distinguish drug-disease pairs with complete Bayesian audit coverage from pairs with partial evidence support. Table S3 reports the number of pairs, unique drugs, and unique diseases in each tier.

**Table S3.** Evidence coverage tiers across audited drug-disease pairs.

| Coverage tier           | Drug-disease pairs | Unique drugs | Unique diseases |
|-------------------------|--------------------|--------------|-----------------|
| Literature tier         | 15                 | 9            | 13              |
| Full Bayesian           | 13                 | 9            | 10              |
| Bayesian without safety | 12                 | 5            | 12              |
| Graph tier              | 1                  | 1            | 1               |

## 2.2 Quality-flag definitions

Quality flags identify the main interpretation constraint for each pair. These flags were assigned after integration of terminology evidence, literature composition, safety overlap, graph support, posterior uncertainty, and evidence-readiness score.

**Table S4.** Quality-flag definitions used in the evidence-readiness assessment.

| Quality flag               | Definition                                                                                                      |
|----------------------------|-----------------------------------------------------------------------------------------------------------------|
| High evidence quality      | Strong multi-domain support, limited adverse burden, limited retrieval noise, acceptable posterior uncertainty. |
| Moderate evidence quality  | Evidence support present, but residual uncertainty, sparsity, or mixed signal requires expert review.           |
| Insufficient evidence      | Too little usable evidence for robust interpretation.                                                           |
| Safety-conflicted evidence | Safety-overlap signal and adverse-evidence burden create material conflict.                                     |
| Safety-concerning          | Safety-overlap signal present; review required before prioritisation.                                           |
| Literature-conflicted      | Therapeutic and adverse literature signals both contribute to interpretation.                                   |
| Literature noise dominated | Irrelevant retrieved articles dominate the usable literature set.                                               |
| Terminology uncertainty    | Drug or disease mapping uncertainty limits evidence interpretation.                                             |

## 2.3 Parameter sensitivity

Table S5 reports the perturbation results for all model constants. Eight of ten scenarios satisfied the pre-specified stability rule. Perturbations of  $c_{\max}$ ,  $\tau$ ,  $\lambda$ , and  $w_A$  retained high rank agreement with the baseline analysis. Perturbation of the safety coefficient  $\kappa$  produced greater rank movement, reflecting the direct role of safety overlap in the final semantic evidence adjustment.

**Table S5.** Sensitivity analysis for model constants.

| Perturbed parameter | Multiplier | Value  | Pairs | Spearman | Top-10 retained | Median rank shift | Max rank shift | Median $ \Delta\mu $ | Stable |
|---------------------|------------|--------|-------|----------|-----------------|-------------------|----------------|----------------------|--------|
| $w_A$               | 0.5        | 1.00   | 41    | 0.9613   | 9               | 1.0               | 12             | 0.0212               | Yes    |
| $w_A$               | 1.5        | 3.00   | 41    | 0.9890   | 9               | 1.0               | 6              | 0.0121               | Yes    |
| $c_{\max}$          | 0.5        | 100.00 | 41    | 0.9969   | 10              | 0.0               | 2              | 0.0231               | Yes    |
| $c_{\max}$          | 1.5        | 300.00 | 41    | 0.9995   | 10              | 0.0               | 1              | 0.0114               | Yes    |
| $\lambda$           | 0.5        | 25.00  | 41    | 0.9970   | 10              | 0.0               | 3              | 0.0171               | Yes    |
| $\lambda$           | 1.5        | 75.00  | 41    | 0.9988   | 10              | 0.0               | 2              | 0.0124               | Yes    |
| $\kappa$            | 0.5        | 0.25   | 41    | 0.9329   | 7               | 2.0               | 13             | 0.0528               | No     |
| $\kappa$            | 1.5        | 0.75   | 41    | 0.9249   | 8               | 2.0               | 15             | 0.0528               | No     |
| $\tau$              | 0.5        | 12.50  | 41    | 0.9969   | 10              | 0.0               | 3              | 0.0059               | Yes    |
| $\tau$              | 1.5        | 37.50  | 41    | 0.9983   | 10              | 0.0               | 2              | 0.0069               | Yes    |

$|\Delta\mu|$  denotes the absolute posterior-mean shift relative to the baseline run. Top-10 retained denotes the number of baseline top-10 ranked pairs also present in the perturbed top-10 set.

#### 2.4 Pair-level evidence-readiness audit

Table S6 reports a compact pair-level audit table. The table includes coverage tier, usable literature count, adverse and irrelevant proportions, safety-overlap score, posterior mean, credible-interval width, evidence-readiness score, and quality flag. These fields were selected to show the evidence basis and the main interpretation constraint without reproducing the full computational ledger.

Table S6: Compact pair-level evidence-readiness audit.

| Drug–disease pair                       | Coverage                | Articles | Adverse | Noise | $\gamma$ | $\mu_{\text{post}}$ | CI width | ERS  | Quality flag               |
|-----------------------------------------|-------------------------|----------|---------|-------|----------|---------------------|----------|------|----------------------------|
| aspirin–colorectal cancer               | Literature tier         | 39       | 0.026   | 0.179 | 0.750    | 0.473               | 0.135    | 61.3 | Terminology uncertainty    |
| aspirin–pre-eclampsia                   | Full Bayesian           | 40       | 0.000   | 0.225 | 0.200    | 0.708               | 0.122    | 87.9 | High evidence quality      |
| azithromycin–albuminuria                | Bayesian without safety | 5        | 0.000   | 0.800 | 0.200    | 0.366               | 0.199    | 67.1 | Literature noise dominated |
| azithromycin–bronchiectasis             | Full Bayesian           | 40       | 0.000   | 0.250 | 0.850    | 0.449               | 0.134    | 76.6 | Safety-concerning          |
| azithromycin–cystic fibrosis            | Bayesian without safety | 40       | 0.075   | 0.450 | 0.700    | 0.278               | 0.120    | 72.5 | Moderate evidence quality  |
| azithromycin–frailty                    | Bayesian without safety | 3        | 0.000   | 0.667 | 0.200    | 0.436               | 0.223    | 63.8 | Moderate evidence quality  |
| azithromycin–venous thrombosis          | Bayesian without safety | 16       | 0.250   | 0.563 | 0.800    | 0.171               | 0.121    | 65.2 | Safety-conflicted evidence |
| colchicine–atherosclerosis              | Bayesian without safety | 40       | 0.025   | 0.200 | 0.200    | 0.665               | 0.127    | 86.0 | High evidence quality      |
| colchicine–coronary artery disease      | Full Bayesian           | 40       | 0.050   | 0.250 | 0.750    | 0.406               | 0.132    | 78.4 | Safety-concerning          |
| colchicine–heart failure                | Bayesian without safety | 40       | 0.000   | 0.500 | 0.800    | 0.344               | 0.128    | 73.1 | Safety-concerning          |
| colchicine–myocardial infarction        | Bayesian without safety | 40       | 0.050   | 0.200 | 0.750    | 0.425               | 0.133    | 77.6 | Safety-concerning          |
| dexamethasone–acute leukaemia           | myeloid Literature tier | 40       | 0.050   | 0.500 | 0.750    | 0.288               | 0.122    | 56.4 | Terminology uncertainty    |
| dexamethasone–covid-19                  | Full Bayesian           | 40       | 0.075   | 0.100 | 0.850    | 0.416               | 0.132    | 79.2 | Safety-concerning          |
| dexamethasone–multiple myeloma          | Full Bayesian           | 40       | 0.000   | 0.225 | 0.850    | 0.459               | 0.134    | 78.1 | Safety-concerning          |
| hydroxychloroquine–covid-19             | Full Bayesian           | 40       | 0.225   | 0.275 | 0.750    | 0.147               | 0.095    | 77.0 | Safety-conflicted evidence |
| hydroxychloroquine–lupus erythematosus  | Literature tier         | 40       | 0.025   | 0.175 | 0.850    | 0.448               | 0.134    | 59.9 | Terminology uncertainty    |
| hydroxychloroquine–melanoma             | Full Bayesian           | 40       | 0.100   | 0.300 | 0.200    | 0.425               | 0.133    | 85.7 | High evidence quality      |
| hydroxychloroquine–pancreatic cancer    | Literature tier         | 40       | 0.050   | 0.250 | 0.700    | 0.417               | 0.132    | 60.8 | Terminology uncertainty    |
| hydroxychloroquine–prostate cancer      | Literature tier         | 8        | 0.250   | 0.250 | 0.200    | 0.244               | 0.162    | 60.4 | Terminology uncertainty    |
| hydroxychloroquine–rheumatoid arthritis | Literature tier         | 36       | 0.083   | 0.167 | 0.850    | 0.377               | 0.132    | 59.4 | Terminology uncertainty    |
| ivermectin–covid-19                     | Full Bayesian           | 40       | 0.150   | 0.575 | 0.700    | 0.124               | 0.088    | 73.8 | Moderate evidence quality  |
| ivermectin–malaria                      | Bayesian without safety | 40       | 0.025   | 0.225 | 0.800    | 0.435               | 0.133    | 74.5 | Safety-concerning          |
| ivermectin–strongyloidiasis             | Literature tier         | 38       | 0.026   | 0.132 | 0.800    | 0.480               | 0.135    | 61.2 | Terminology uncertainty    |
| levodopa–cardiovascular diseases        | Bayesian without safety | 40       | 0.300   | 0.500 | 0.200    | 0.118               | 0.086    | 79.4 | Literature-conflicted      |
| levodopa–depression                     | Literature tier         | 31       | 0.194   | 0.484 | 0.850    | 0.134               | 0.095    | 54.1 | Terminology uncertainty    |

Continued on next page

| Drug–disease pair                           | Coverage                | Articles | Adverse Noise | $\gamma$ | $\mu_{\text{post}}$ | CI width | ERS   | Quality flag                   |
|---------------------------------------------|-------------------------|----------|---------------|----------|---------------------|----------|-------|--------------------------------|
| levodopa–sarcopenia                         | Bayesian without safety | 13       | 0.000         | 0.615    | 0.800               | 0.329    | 0.159 | 61.5 Safety-concerning         |
| levodopa–tinnitus                           | Graph tier              | 0        | NA            | 0.000    | NA                  | 0.481    | 0.268 | 62.9 Insufficient evidence     |
| metformin–chronic kidney disease            | Literature tier         | 40       | 0.050         | 0.275    | 0.800               | 0.383    | 0.131 | 58.9 Terminology uncertainty   |
| metformin–colorectal cancer                 | Literature tier         | 40       | 0.025         | 0.250    | 0.700               | 0.454    | 0.134 | 61.0 Terminology uncertainty   |
| metformin–endometrial cancer                | Literature tier         | 40       | 0.025         | 0.200    | 0.200               | 0.670    | 0.126 | 69.4 Terminology uncertainty   |
| metformin–mania                             | Bayesian without safety | 35       | 0.029         | 0.371    | 0.200               | 0.527    | 0.137 | 82.8 High evidence quality     |
| metformin–mitochondrial diseases            | Full Bayesian           | 37       | 0.378         | 0.162    | 0.200               | 0.126    | 0.090 | 85.4 Literature-conflicted     |
| metformin–non-alcoholic fatty liver disease | Full Bayesian           | 40       | 0.025         | 0.425    | 0.850               | 0.340    | 0.127 | 74.8 Safety-concerning         |
| metformin–uterine cervical dysplasia        | Bayesian without safety | 8        | 0.125         | 0.500    | 0.200               | 0.298    | 0.172 | 74.7 Moderate evidence quality |
| rituximab–rheumatoid arthritis              | Literature tier         | 40       | 0.025         | 0.125    | 0.750               | 0.500    | 0.134 | 62.1 Terminology uncertainty   |
| sirolimus–kidney transplant rejection       | Literature tier         | 38       | 0.105         | 0.342    | 0.850               | 0.272    | 0.120 | 56.8 Terminology uncertainty   |
| sirolimus–lymphangiomyomatosis              | Full Bayesian           | 40       | 0.050         | 0.125    | 0.850               | 0.437    | 0.133 | 78.9 Safety-concerning         |
| sirolimus–tuberous sclerosis                | Full Bayesian           | 40       | 0.000         | 0.200    | 0.800               | 0.485    | 0.134 | 79.0 Safety-concerning         |
| statins–Alzheimer’s disease                 | Literature tier         | 40       | 0.075         | 0.375    | 0.700               | 0.319    | 0.125 | 58.7 Terminology uncertainty   |
| statins–sepsis                              | Literature tier         | 40       | 0.050         | 0.375    | 0.200               | 0.481    | 0.134 | 66.4 Terminology uncertainty   |
| thalidomide–multiple myeloma                | Full Bayesian           | 40       | 0.075         | 0.050    | 0.850               | 0.437    | 0.133 | 80.0 Safety-concerning         |

### 3 Supplementary Interpretation

The sensitivity analysis indicates that the posterior ranking and evidence-readiness categories were stable under perturbation of the prior concentration parameters, the graph likelihood strength, and the adverse-evidence weight. The safety coefficient had greater rank influence because the safety-overlap term enters the final semantic evidence score before Bayesian updating. This supports the main manuscript interpretation that safety overlap should remain a separate audit dimension rather than be absorbed into a single posterior score.
